# Supplementary material for: Study on aging behavior of polyethylene glycol under three wavelengths of ultraviolet light irradiation
Source: Royal Society of Chemistry journal article supplement (doi:10.1039/d3ra06407g), 2023-01-01
Supplement: d3ra06407g1.pdf [file d3ra06407g1.pdf]

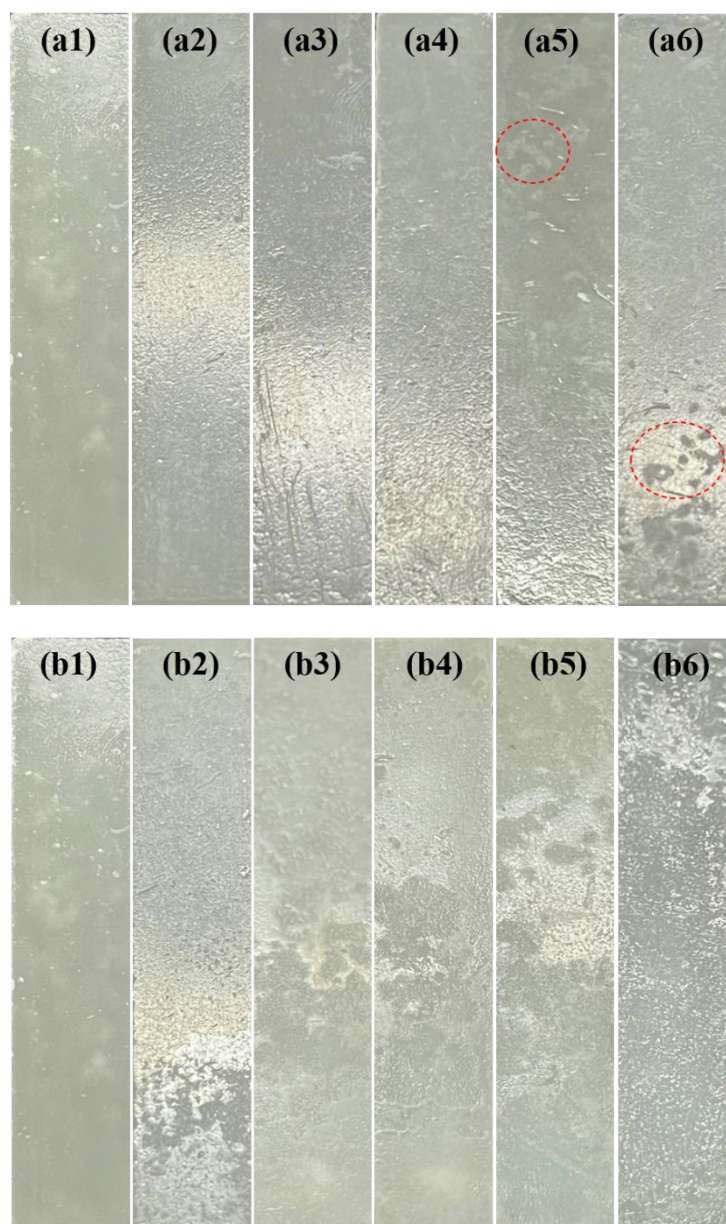

**Fig. S1** Photographs of PEG2000 irradiated with (a) 351 and (b) 313 nm UV light for different times: (1) 0 h, (2) 120 h, (3) 240 h, (4) 360 h, (5) 480 h, and (6) 600 h.

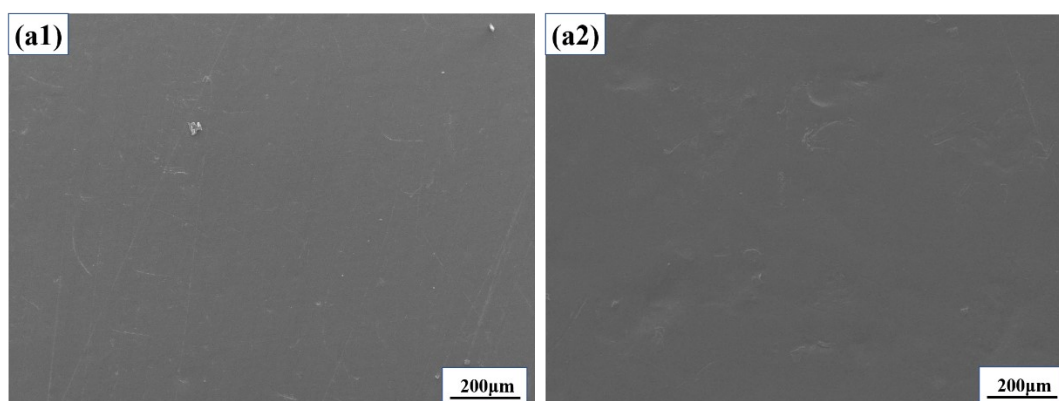

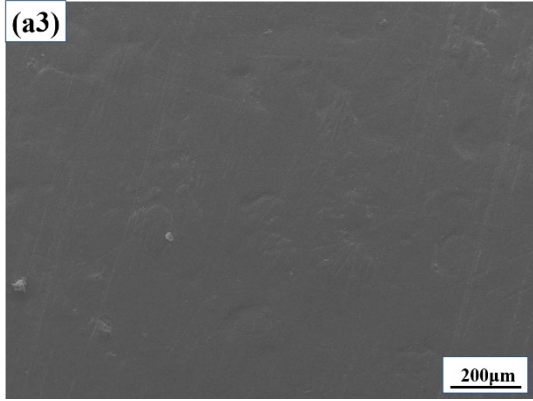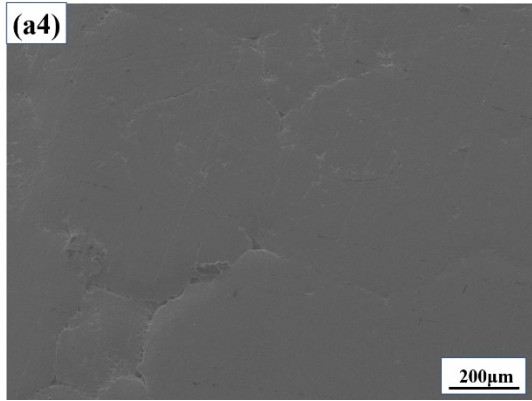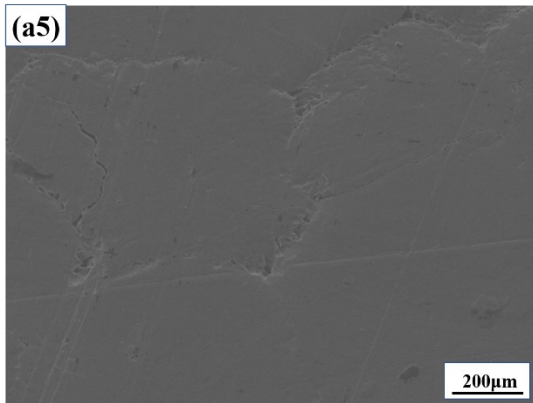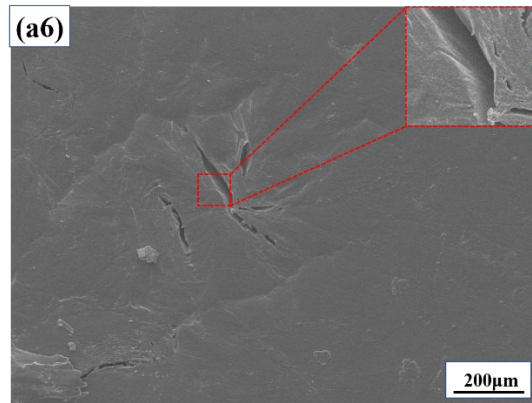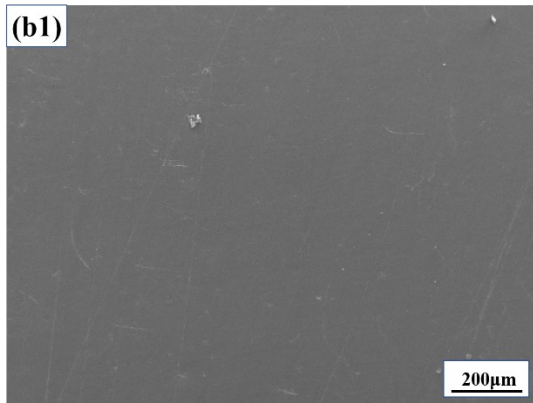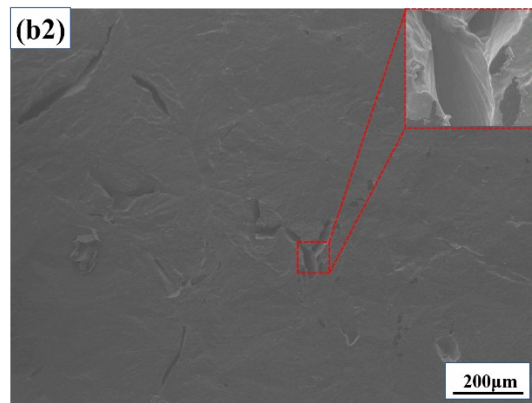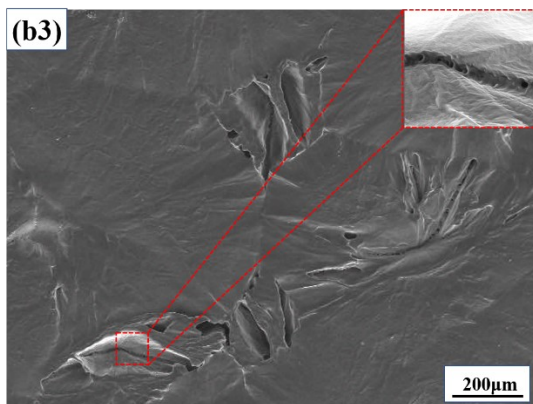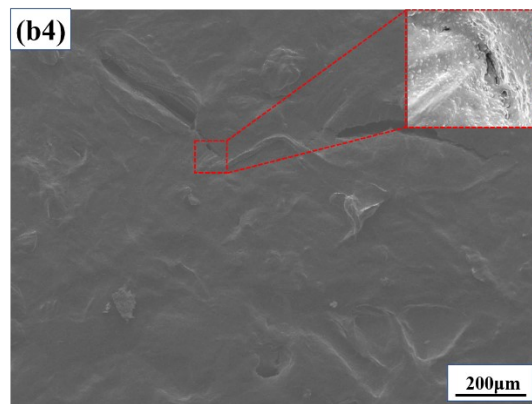

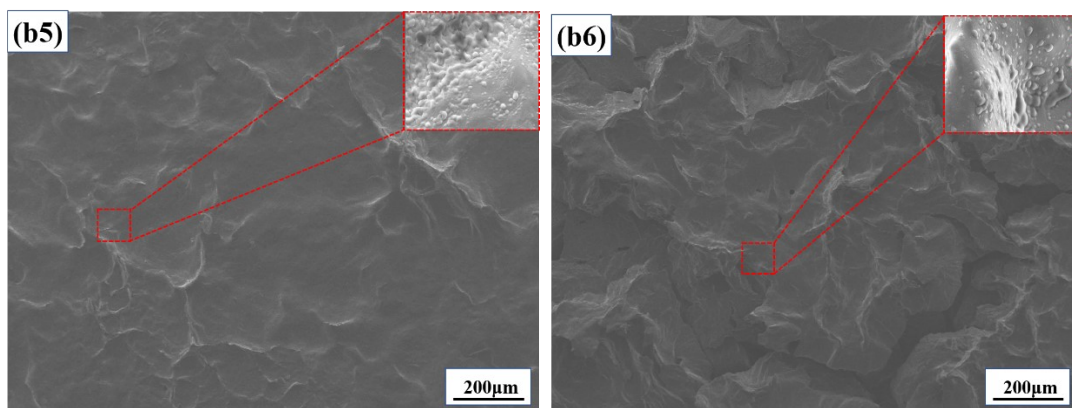

**Fig. S2** SEM images of PEG2000 irradiated with (a) 351 and (b) 313 nm UV light for different times: (1) 0 h, (2) 120 h, (3) 240 h, (4) 360 h, (5) 480 h, and (6) 600 h.
